# Supplementary material for: Development of a CMAQ-PMF-based composite index for prescribing an effective ozone abatement strategy: A case study of sensitivity of surface ozone to precursor VOC species in southern Taiwan
Source: Copernicus journal article supplement (doi:10.5194/acp-2022-691), 2022-11-02
Supplement: Supplementary file 1 [file acp-2022-691-supplement.pdf]

# **Supplement for “Development of a CMAQ-PMF-based composite index for prescribing an effective ozone abatement strategy: A case study of sensitivity of surface ozone to precursor VOC species in southern Taiwan”**

Jackson Hian-Wui Chang<sup>1,2</sup>, Stephen M. Griffith<sup>1#</sup>, Steven Soon-Kai Kong<sup>1</sup>, Ming-Tung Chuang<sup>3</sup>, Neng-Huei Lin<sup>1,4,\*</sup>

<sup>1</sup>Department of Atmospheric Sciences, National Central University, Taoyuan, 32001, Taiwan

<sup>2</sup>Preparatory Center for Science and Technology, University Malaysia Sabah, Jalan UMS, 88400, Kota Kinabalu, Sabah, Malaysia

<sup>3</sup>Research Center for Environmental Changes, Academia Sinica, Taipei 11529, Taiwan

<sup>4</sup>Center for Environmental Monitoring and Technology, National Central University, Taoyuan, 32001, Taiwan

<sup>#</sup>Presently affiliated with Department of Atmospheric Sciences, National Taiwan University, Taipei 10617, Taiwan

*Correspondence to:* Neng-Huei Lin ([nhlin@cc.ncu.edu.tw](mailto:nhlin@cc.ncu.edu.tw))

## **Supplementary Materials**

### **Photochemical Assessment Monitoring Stations (PAMS)**

Taiwan's Environmental Protection Administration (Taiwan EPA) has set up nine Photochemical Assessment Monitoring Stations (PAMS) in western Taiwan, each was placed to the nearby air quality monitoring station to enable simultaneous measurement of air pollutants and VOC species. Among the nine PAMS stations, three stations are located in southern Taiwan namely Chaozhou (CZ, 22.52°N, 120.56°E), Qiaotou (QT, 22.76°N, 120.64°E), Xiaogang (XG, 22.57°N, 120.34°E). The CZ station is in a suburban area which is near to a freeway and an expressway both on the west side, with some small factories scattered around. The QT station is near to a freeway with an expressway to the east, with three industrial parks to the northwest, south and south-southeast. It also hosted a major oil refinery in the south-southeast industrial park. The XG station is surrounded by a freeway on the northwest side, a harbor to the northwest and four industrial parks to the east, southeast and west.

The Taiwan EPA VOC data sampling and instrumental analysis adopted the standards same as those used by the US EPA. Each PAMS station collected 54 VOC species on hourly basis, including 28 alkanes, 9 alkenes, 1 alkyne, 16 aromatics. The VOC species are monitored by a commercial GC system and the instruments are calibrated using standard gas every five days using calibration curves, relative standard deviation (RSD), and method detection limit (MDL) for each VOC species. To ensure high quality assurance and quality control QA/QC data, the calibration curve has correlation coefficient  $>0.995$ ; the precision was determined by seven replicate measurements of the calibration gas and the RSD less than 10% is maintained for each VOC species. All of the October 2018 PAMS-QA/QC data at CZ, QT and XG station were used in this study

### **Model Evaluations**

First, we assessed the WRF model's ability to reasonably reproduce the meteorology conditions. 2-m temperature (T2), 10-m wind speed (WS) and wind direction (WD) measured by the 15 air quality Taiwan Environmental Protection Agency (TEPA) stations were compared with WRF model output at the corresponding grid cell for each stations for the entire simulation period 7-22 Oct 2018 (Figure S8). The model evaluation metrics averaged from the

15 stations are shown in Table S2. Among the 15 stations, 10 stations are selected to represent the urban stations and the other 5 stations as rural stations (Table S3). The comparison shows that the simulations captured the observed diurnal maxima and minima of T2 and WS accurately for both urban and rural stations. The 2-m temperature is slightly underestimated by 0.92 °C, but still highly correlated with the measured T2 with IOA > 0.89. For wind speed, the mean bias (MB, 0.15 m s<sup>-1</sup>), mean average gross error (MAGE, 0.96 m s<sup>-1</sup>), index of agreement (IOA, 0.85) are presented. For wind direction, the wind normalized mean bias (WNMB) and wind normalized mean error (WNME) are -1.12 °, 28.26 °, respectively. The relatively uniform comparison show that the WRF simulation agrees well with the observed wind directions.

The comparison between the observed and simulated timeseries O<sub>3</sub>, NO<sub>2</sub> and VOC from various TEPA stations are presented in Figure S9. In general, the air quality modelling system produces a good simulation of the diurnal variations in O<sub>3</sub>. The magnitude of the daily 8h maxima and the spatial distribution for O<sub>3</sub> are also reasonably well predicted where higher concentration is simulated over the western coastal region and gradually decreases along the mountainous region and low concentration over the eastern coastal region (Figure S10a). Based on the modelled result, the occurrence of daily 8h maxima O<sub>3</sub> > 75 ppb is less frequent over the urban area nearby the large point source but more frequently occurs over the inland area, indicating the severity of the inland photochemical ozone pollution problem in the study area (Figure S10b). The model performance for NO<sub>2</sub> and VOC are also evaluated in Table S2. The mean normalized bias (MNB) of NO<sub>2</sub> and VOC are estimated as 28% and -0.42%, respectively, which is comparable to the acceptable performance range of -40 to 50% recommended by USEPA benchmark. The simulated NO<sub>2</sub> and VOC are also well correlated with the observed value with IOA greater than 0.67 and 0.63, respectively. The spatial distribution of the modelled daily maxima NO<sub>2</sub> and VOC are also highly concentrated over the western coastal urban area with abundant emission sources. In overall, the statistical performance for modelled O<sub>3</sub>, NO<sub>2</sub> and VOC are acceptable and comparable to other models and studies (Cheng et al., 2015; Li et al., 2013; Tang et al., 2017; Tsai and Wu, 2006).

### Zero-out Source Contribution

We further examine the relationship between ozone and its precursors (i.e. NO<sub>x</sub> and VOC) by decomposing the zero-out source contribution of domain-wide NO<sub>x</sub> and VOC emissions to ozone concentration in the cells corresponding to urban area (represented by urban grid cells) and inland area (represented by cropland/woodland mosaic). Defined by (Cohan et al., 2005), the zero-out source contribution of a source species or region p<sub>j</sub>, representing the reduction in concentrations that would occur if that source was removed completely, can be approximated by:

$$ZOC(p_j) \approx S_j^{(1)} - \frac{1}{2} S_{j,j}^{(2)} \quad (10)$$

In the case for estimating ozone reduction due to NO<sub>x</sub> and VOC, the contribution of the two sources p<sub>NO<sub>x</sub></sub> and p<sub>VOC</sub> can be approximated by

$$ZOC(p_{NO_x} + p_{VOC}) \approx \left( S_{NO_x}^{(1)} - \frac{1}{2} S_{NO_x,NO_x}^{(2)} \right) + \left( S_{VOC}^{(1)} - \frac{1}{2} S_{VOC,VOC}^{(2)} \right) - S_{NO_x,VOC}^{(2)} \quad (11)$$

which incorporates the first-order, second-order and cross sensitivity of NO<sub>x</sub> and VOC. The first two terms represents the zero-out contribution of NO<sub>x</sub> emissions; the third and forth terms represents the zero-out contribution of VOC emissions and finally the cross sensitivity between NO<sub>x</sub> and VOC emissions represents the extent to which each emitter influences the zero-out contribution of the other.

On the zero-out contribution basis, NO<sub>x</sub> emissions are more important than the VOC emissions (Figure S11). Unlike the previous studies in Atlanta (Cohan et al., 2005) and Houston (Xiao et al., 2010) that demonstrated a clear daily cycle of NO<sub>x</sub> first- and second-order zero-out contributions (i.e. positive during daytime; negative during nighttime), our results show the NO<sub>x</sub> first-order zero-out contribution remains largely negative (increase of O<sub>3</sub>) even during the daytime photochemical active hours in both urban and inland areas indicating the important role of titration effect on ozone. This is likely attributed to the high NO<sub>x</sub> emissions of the study area where the total emission averaged during the entire simulation is approximately 807 tones per day (tpd) in urban area (653 km<sup>2</sup>) and 187 tpd in inland area (459 km<sup>2</sup>) which gives emission denisty 1.236 tpd/km<sup>2</sup> and 0.407 tpd/km<sup>2</sup>, respectively that is far greater than Atlanta and Houston (Table S4). Besides, inland ozone experiences higher second-order NO<sub>x</sub> contribution especially daytime

when compared to urban. The intense non-linearity of  $\text{NO}_x$  zero-out contribution in inland areas indicated by the large negative second-order sensitivities can be explained by the inland ozone production sensitivity favors of  $\text{NO}_x$ -limited regime. First-order VOC zero-out contribution in both urban and inland areas is always positive (decrease in  $\text{O}_3$ ) and becomes important only during the daytime hours, reflecting the dominant effect of OH free radicals in driving the  $\text{HO}_x$  cycle. Note that the peak of first-order VOC contribution in inland area is slightly shifted or delayed 1-2 hours as compared to urban areas. This temporal shift is possibly attributed to the sea-breeze penetration that pushes the urban polluted air (i.e. anthropogenic VOC ) towards inland areas. The cross-sensitivity between  $\text{NO}_x$  and VOC zero-out contribution is always negative (increase of  $\text{O}_3$ ) in both urban and inland areas, indicating that when  $\text{NO}_x$  (VOC ) emissions are reduced, ozone becomes less sensitive to VOC ( $\text{NO}_x$ ). Due to the more intense non-linearity  $\text{NO}_x$  contribution in inland areas than urban areas, the inland cross-sensitivity is also found to be higher than urban areas. Rural areas far from anthropogenic emissions typically exhibited more linear response to  $\text{NO}_x$  and virtually no response to VOC. However, our modelling indicates the inland areas' ozone response to VOC zero-out contribution remain largely dominant and also has high non-linearity of  $\text{NO}_x$  contribution. This tells us that VOC control can achieve the co-benefit to reduce the ozone pollution problem in both urban and inland area.

### **Source Profiles of PMF Model**

Factor 1 is dominated by single-species isoprene which is indicative of the biogenic emissions. It is accounted for 90.9%, 83.4%, and 80.9% in CZ, QT, and XG, respectively. The hourly factor contribution also displays a clear diurnal cycle peak at the noon time 10-12 LST in all three stations (Figure 10). The contribution of biogenic sources to total VOCs concentration is 12%.

Factor 2 is dominated by aromatic-species with high percentage of toluene (32.2% in CZ, 59.4% in QT, 62.5% in XG), ethylbenzene (51.4% in CZ, 40.0% in QT, 35.4% in XG), m,p-xylene (64.5% in CZ, 40.6% in QT, 35.9% in XG), and o-xylene (66.2% in CZ, 42.1% in QT, 41.2% in XG) in all three stations. It is also characterized by moderate percentage of C6-C8 alkanes and benzene. A high portion of BTEX is typically related to the use of solvents in painting, coating, synthetic fragrances, adhesives and cleaning agents (Huang and Hsieh, 2020; Hui et al., 2018; Wu

et al., 2016). The hourly factor contribution in XG has a clear bimodal peak at 10 and 16 LST, both correspond to industrial activity. The contribution of solvent usage to total VOCs concentration is 17%, which is the third most important source of VOC pollution in the study area.

Factor 3 is mainly dominated by alkanes-species with high percentage of ethane (45.6% ), propane (53.0%), isobutane (51.4%) and n-butane (52.1%) in all three stations. It also features lower percentages of C6-C10 alkanes and aromatics. These species are closely related to vehicular emissions (Hui et al., 2018; Liu et al., 2008). Besides, moderate percentage of isopentane (32.3%) and n-pentane (34.3%) are also observed in this factor, which are the major indicators of gasoline fuel evaporation (Li et al., 2018). Acetylene is a well-known combustion tracer and also presented in this source, indicating that the emission exhaust is likely related to liquefied petroleum gas (LPG) emissions. The contribution of vehicular emissions to total VOC concentration was 22%, which constituted the largest source of VOC pollution in the study area. This is also consistent with findings from Huang and Hsieh (2020) where traffic emissions including vehicular emissions and vehicle fuel evaporation has the largest proportion in western Taiwan, accounted for 23-37% of the total contributions.

Factor 4 is dominated by a single-species cyclohexane, accounted for 76.0% in CZ, 68.6 % in QT, and 77.5 % in XG. Cyclohexane is usually used in the production of intermediates for plastics, textile and nylon, which has a variety of common applications such as clothing, tents, carpets and thermoplastics. These intermediates are cyclohexanol and cyclohexanone, which in turn are use mainly as precursors for the production of adipic acid and caprolactam. The hourly factor contribution in QT and CZ has a clear diurnal cycle peak in the noon time at 11 and 13 LST, respectively which correspond to industrial activity. A two-hours lag in CZ seems to indicate that the source is mainly originated from QT where it is located at the urban coastal region, and subsequently transported to inland CZ downwind of the northeasterly wind. In contrast, the hourly factor contribution in XG peaks in the early morning hours 03-06 LST. These hours are unlikely related to the industrial activity and we speculated it is due to the entrainment process that injects the remaining VOC pollutants from the residual layer to the mixing layer after sunrise. Low percentage of ethylene (15.8%) and propylene (9.1%) are also observed in this source which rules out the possible source from

petrochemical sector. Therefore, this factor is likely attributed to plastics industry and its contribution to total VOCs concentration is 10%.

Factor 5 is dominated by single-species isopropylbenzene, accounted for 82.1% in CZ and 80.4% in QT. Isopropylbenzene is used primarily as an intermediate in the production of phenol and acetone. Other usages include the manufacture of styrene, alpha-methylstyrene, acetophenone, detergents and di-isopropylbenzene as a catalyst for acrylic and polyester-type resins; as a thinner for paints, enamels and lacquers; as a solvent for fat and resins; and in printing and rubber manufacture. Therefore, it is attributed to the manufacturing industry for the production of intermediates for a variety products. This source has the smallest contribution to total VOCs concentration at 5%.

Factor 6 is dominated by multiple-species from C9 aromatics, ethylene and propylene; this factor is identified only in QT and XG. High percentage are accounted for 1,2,4-trimethylbenzene (35.3% in QT and 51.8% in XG) and methyltoluene (43.7% in QT and 58.6% in XG), which are key ingredients in industrial chemical processes (Hui et al., 2018; Zhou et al., 2019). Besides, the gradually increasing trend of 1,2,4-trimethylbenzene may be a result of different paints and solvent formulations used to replace the use of toluene and C8 aromatics in printing industry (Shen et al., 2018). This factor also comprises of high percentage of ethylene (37.9% in QT and 47.6% in XG) and propylene (52.4% in QT and 61.5% in XG), which are mainly attributed to petrochemical plants (Mo et al., 2015; Song et al., 2019). Moderate percentage of acetylene, C5 alkanes (i.e. isopentane, 2,2,4-trimethylpentane), C6-8 aromatics (i.e. toluene m,p-xylene, ethylbenzene, benzene) are also accounted in this factor, which are typical product of combustion in iron and steel industry (Tsai et al., 2008). The hourly factor contribution has a clear bimodal peak at 07 and 18 LST, both correspond to industrial activity. Therefore, it is likely attributed to mixed industry not limited to petrochemical industry, printing industry and metal industry. The contribution of mixed industry to total VOC concentration is 21%, which constituted the second largest source of VOC pollution in the study area.

Factor 7 is characterized by benzene, C2-C5 alkanes (i.e. ethane, propane, isopentane), and small proportions of C7-8 aromatics (i.e. toluene, ethylbenzene), which is related to aged air mass (Huang and Hsieh, 2020; Wu et al., 2016).

Ethanes, propane and benzene have low-reaction rates at 0.3, 1.1, and 1.2 ( $10^{-12}$  cm<sup>3</sup> molecule<sup>-1</sup> s<sup>-1</sup>), respectively, with lifetimes of 23.3, 5.3 and 4.7 days, respectively (Atkinson and Arey, 2003). In addition, this factor is only identified in CZ and its hourly factor contribution mostly existed at more stable levels when compared to other factors except for an obvious peak at 12 LST due to the sea-breeze penetration that pushes the urban polluted aged air mass towards inland area. The ratio between benzene and toluene is often used as indicator of aged air mass. The B/T ratio of this factor is 2.37 which is much higher than vehicle emissions (0.68). Therefore, it is considered to represent the aged air mass and its contribution to total VOCs concentration is 7%.

Factor 8 is characterized by aromatic compounds (i.e. benzene, toluene, xylene isomers (o-xylene, m-xylene and p-xylene), ethyltoluene isomers (i.e. m-ethyltoluene), trimethylbenzene isomers (i.e. 1,2,4-trimethylbenzene)), and fatty groups (ethylene, isobutane, n-butane, and n-hexane) which are related to motorcycle engine exhaust (Jia et al., 2005). This source is only identified in QT and its hourly factor contribution is similar to the vehicle emissions. Therefore, it is considered to represent the motorcycle engine exhaust and its contribution to total VOCs concentration is 7%.

## Supplementary figures and tables

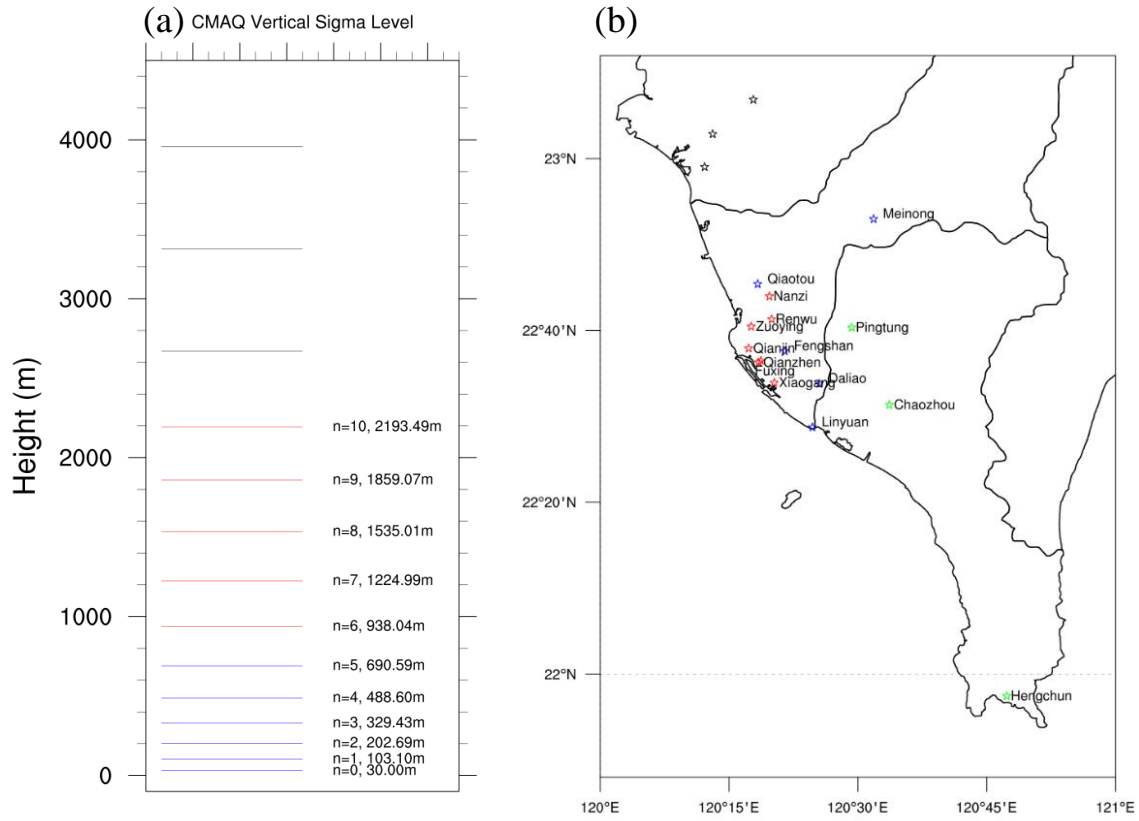

Figure S1: (a) CMAQ vertical layer distribution in eta sigma level. The lowest model level  $n=0$  is approximately 30.0 m above the ground. (b) Distribution of TEPA air quality stations over southern Taiwan.

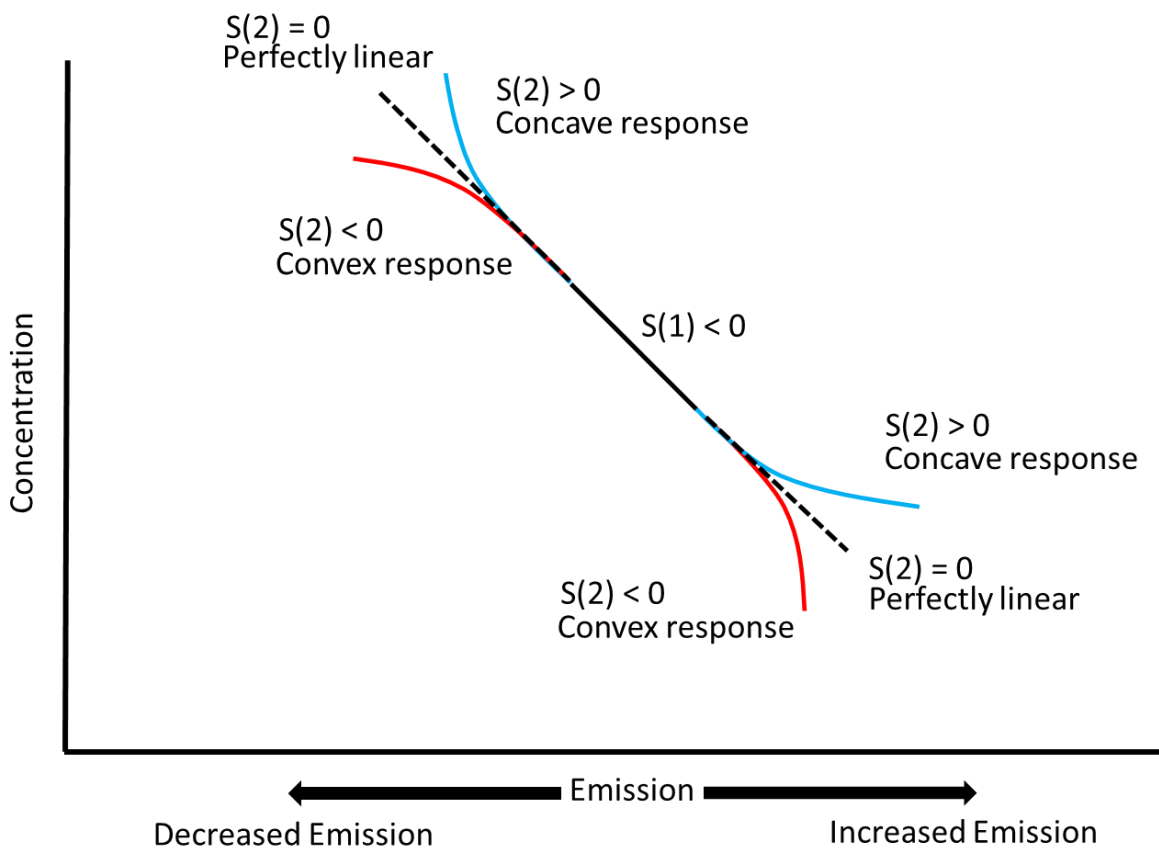

Figure S2: Conceptual diagram of CMAQ-HDDM first-order  $S(1)$  and second-order  $S(2)$  sensitivity coefficient in convex and concave response.

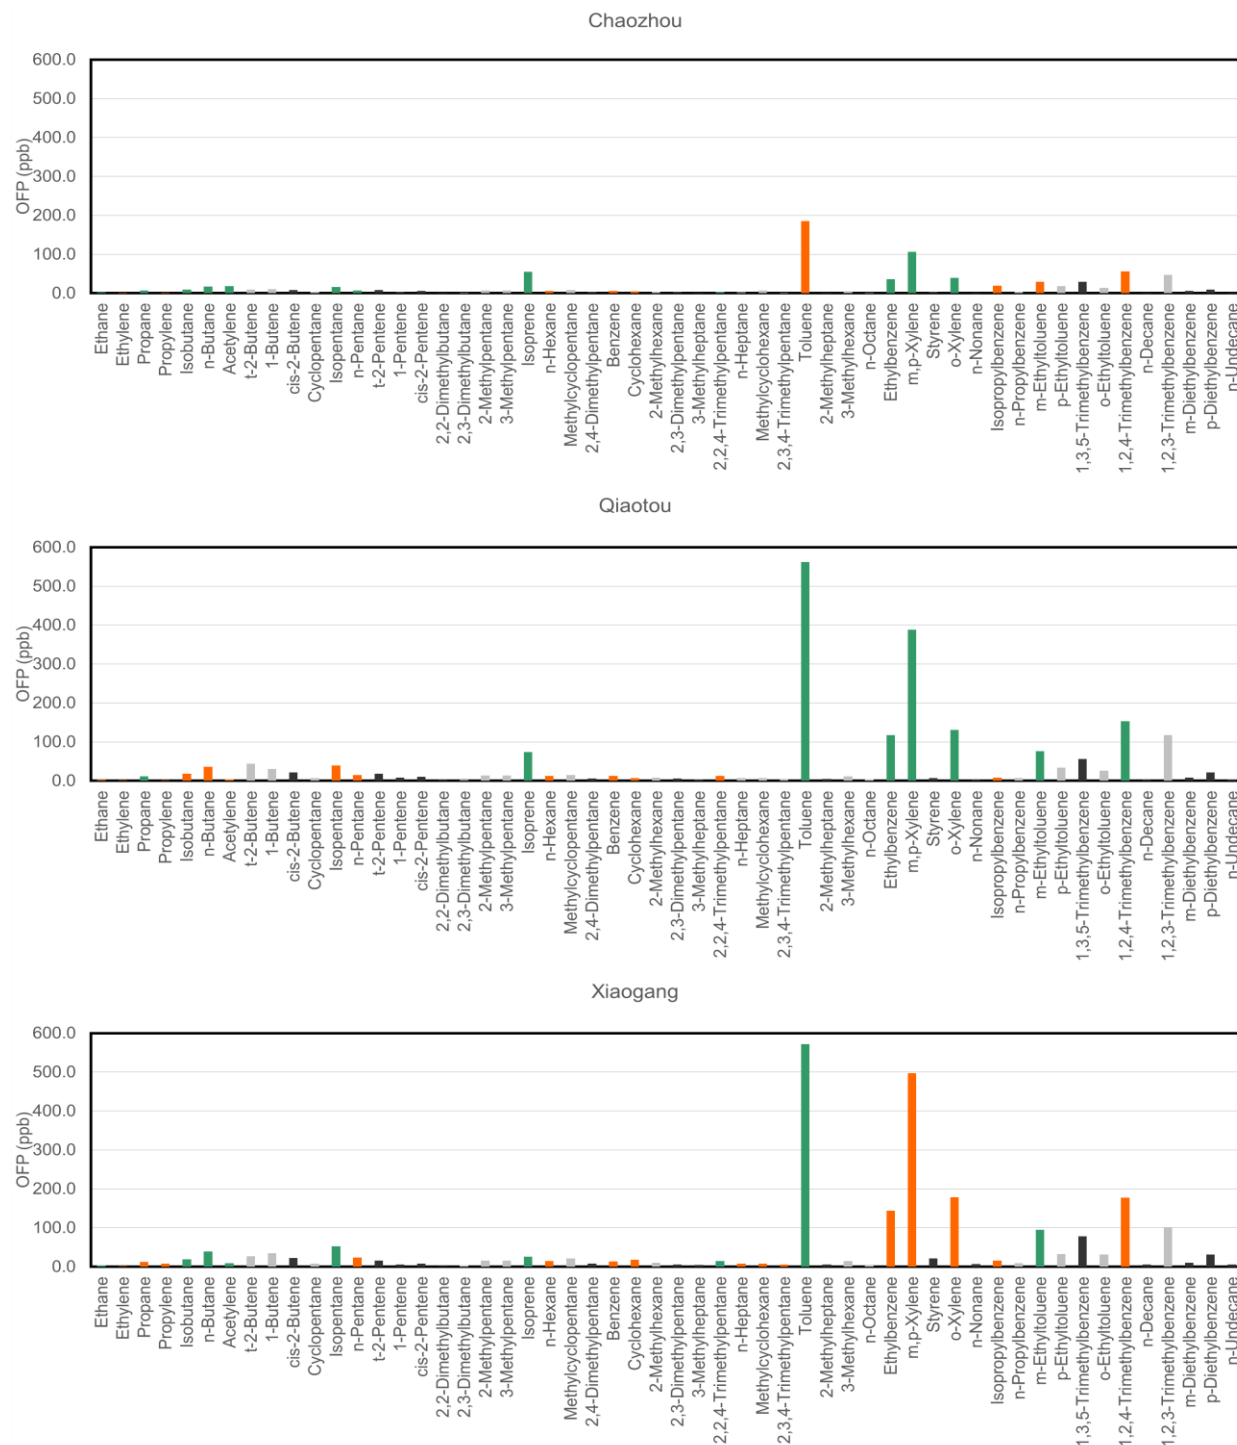

Figure S3: Ozone forming potential (OFP) calculated for each PAMS-VOC species measured at CZ, QT and XG station in Oct 2018. Dark gray species are unused species due to abundant missing data >55% below MDL. Light gray species are poor species with  $S/N < 0.5$ . Orange (Green) species are weak (strong) species with  $S/N \geq 0.5$  and  $R < 0.6$  ( $R \geq 0.6$ ). Both unused and poor species are removed from PMF model analysis.

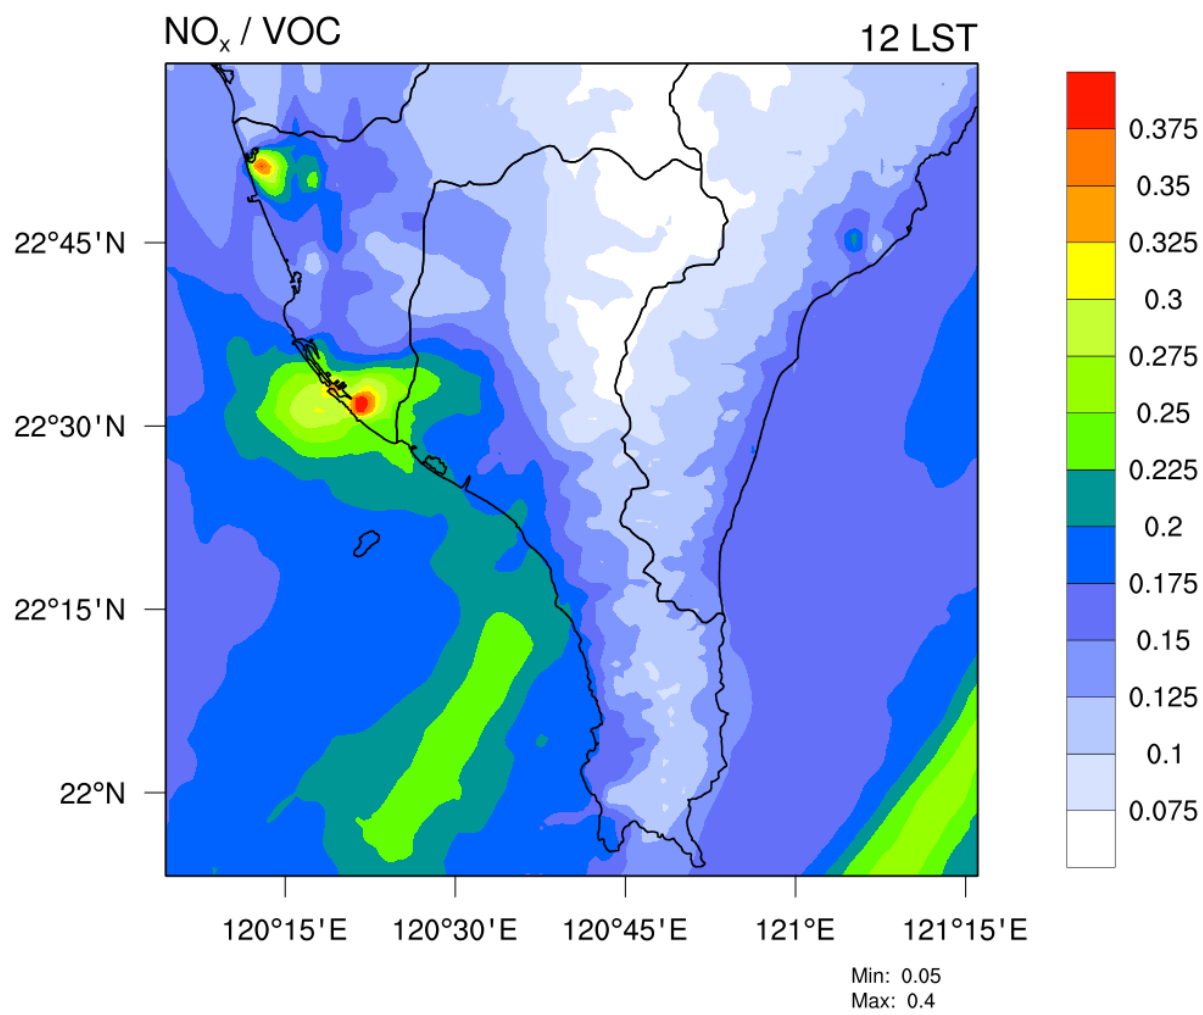

Figure S4: Spatial distribution of ratio NO<sub>x</sub> / VOC averaged at 12:00 LST during the entire simulation period.

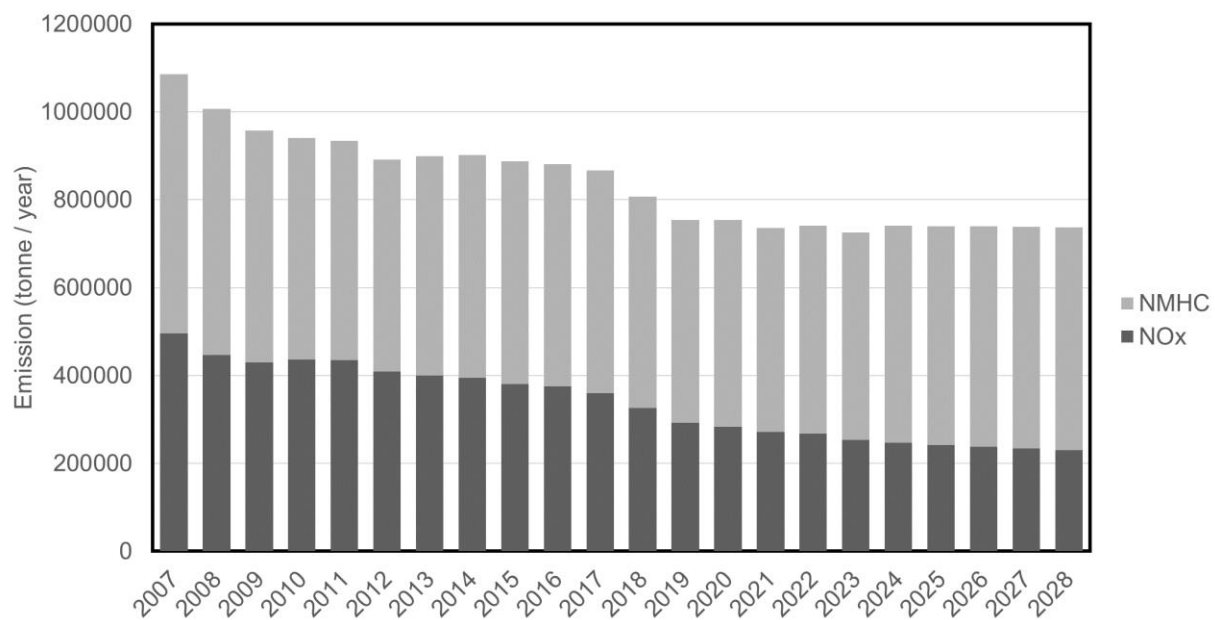

Figure S5: Projected annual emission of NO<sub>x</sub> and NMHC in Taiwan from 2007 to 2028 (Source: Taiwan Emission Data System, TEDS 11.0).

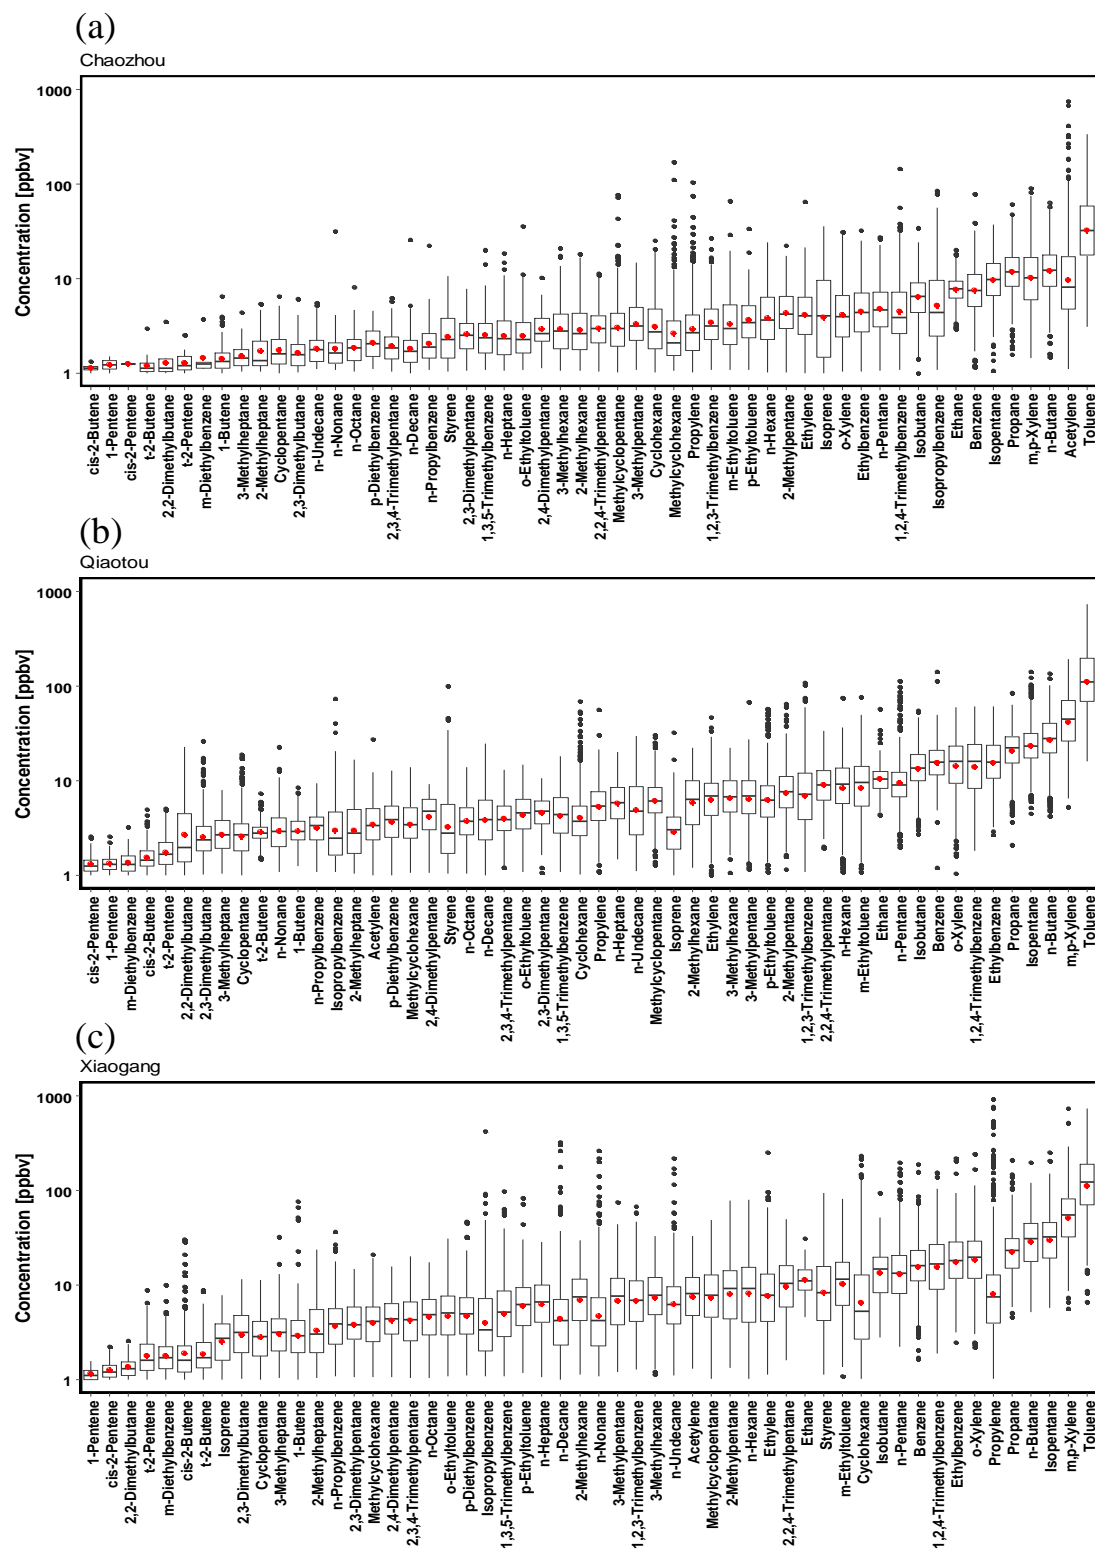

Figure S6: Box plot of 54 PAMS-VOC species measured in (a) Chaozhou, CZ, (b) Qiaotou, QT, (c) Xiaogang, XG during 1-31 October 2018. Species are arranged in ascending order in concentration from left to right.

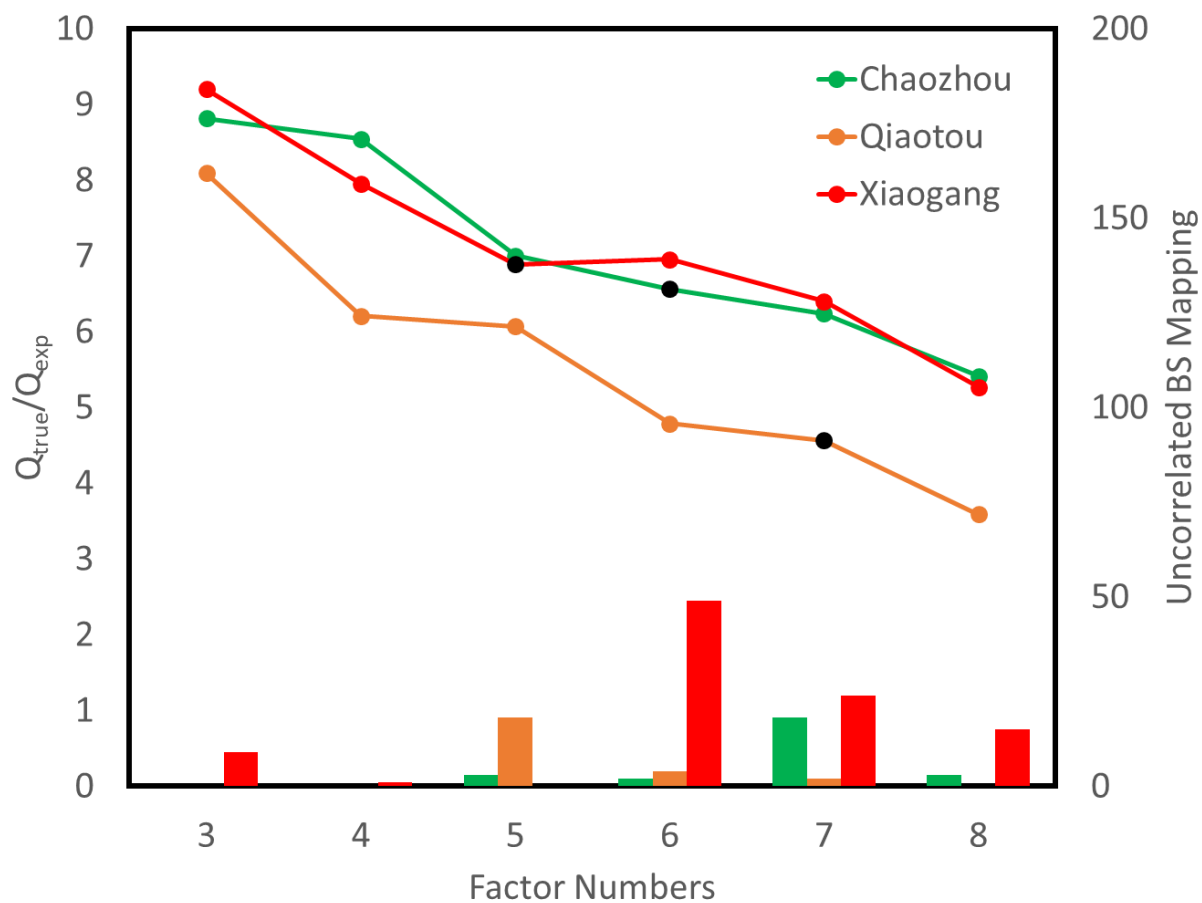

Figure S7: Changes of  $Q_{\text{true}}/Q_{\text{expected}}$  and uncorrelated bootstrap (BS) mapping calculated by the PMF model for increasing factor number from 3 to 8. The black dot represents the optimum solution factors at each station.

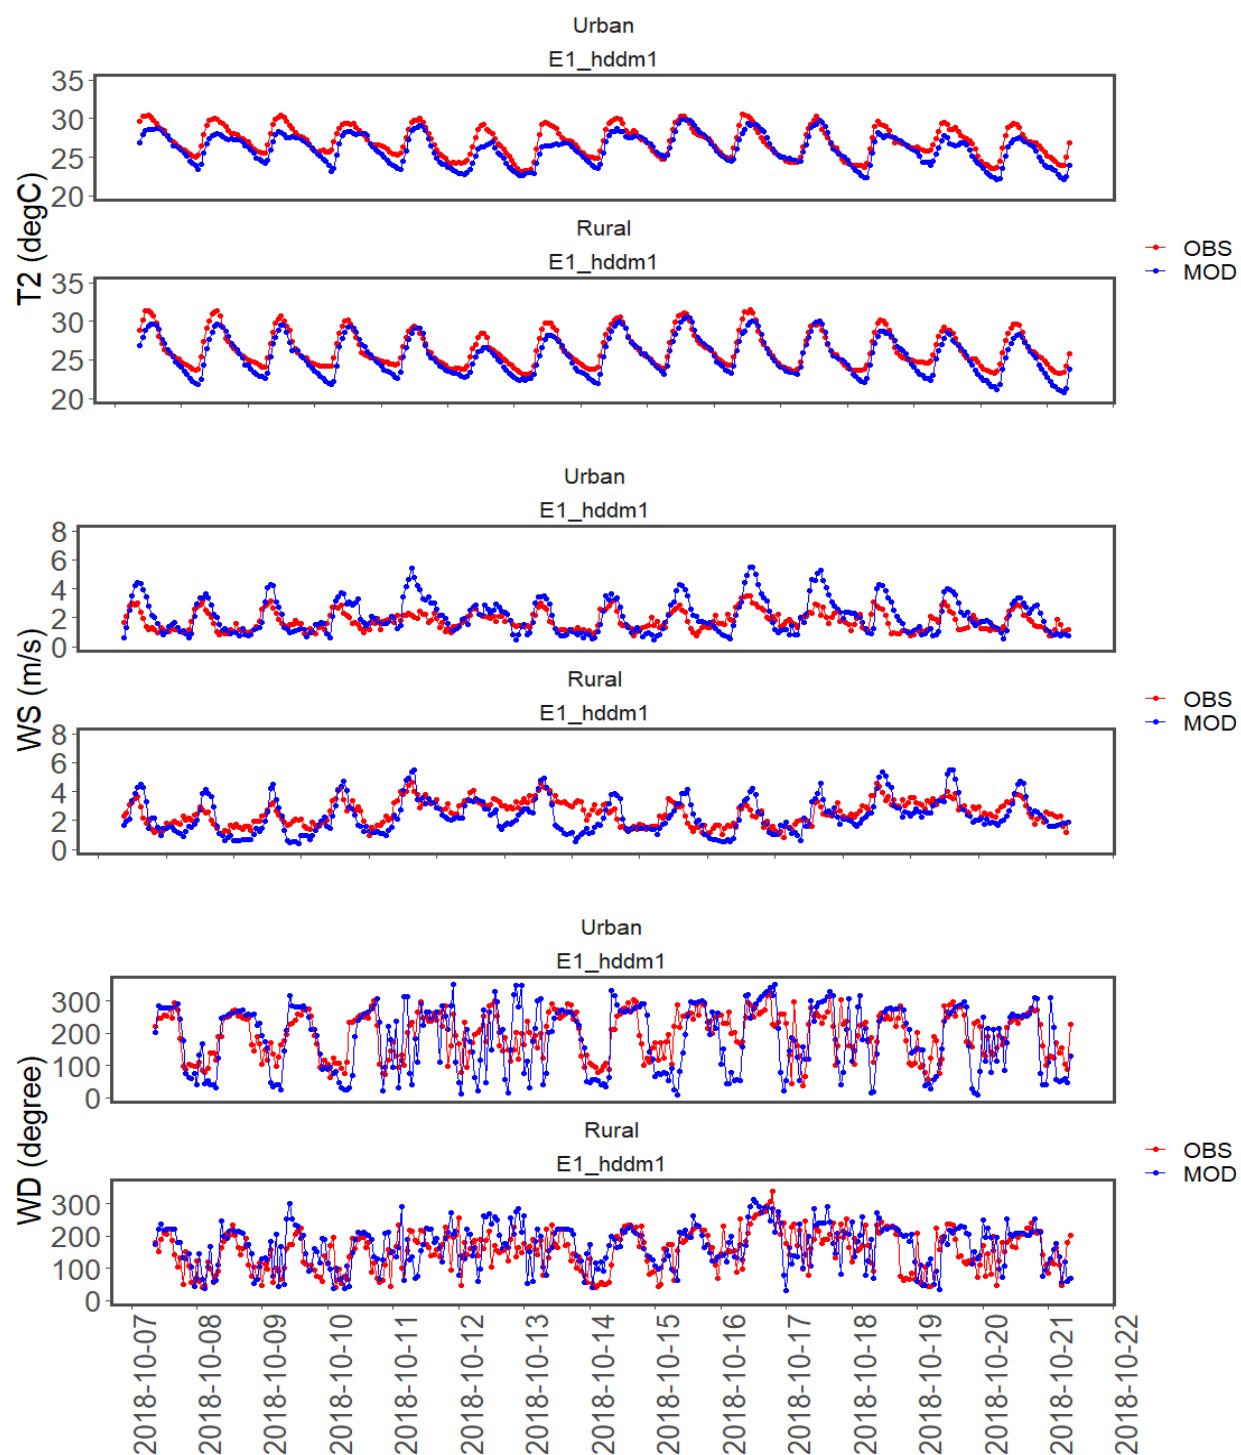

Figure S8: Time series of observed and modelled 2-m temperature (T2), 10-m wind speed and wind direction (WS, WD) averaged over urban (n=10) and rural (n=5) TEPA air quality stations during entire simulation period. Refer Table S3 for urban and rural TEPA air quality stations

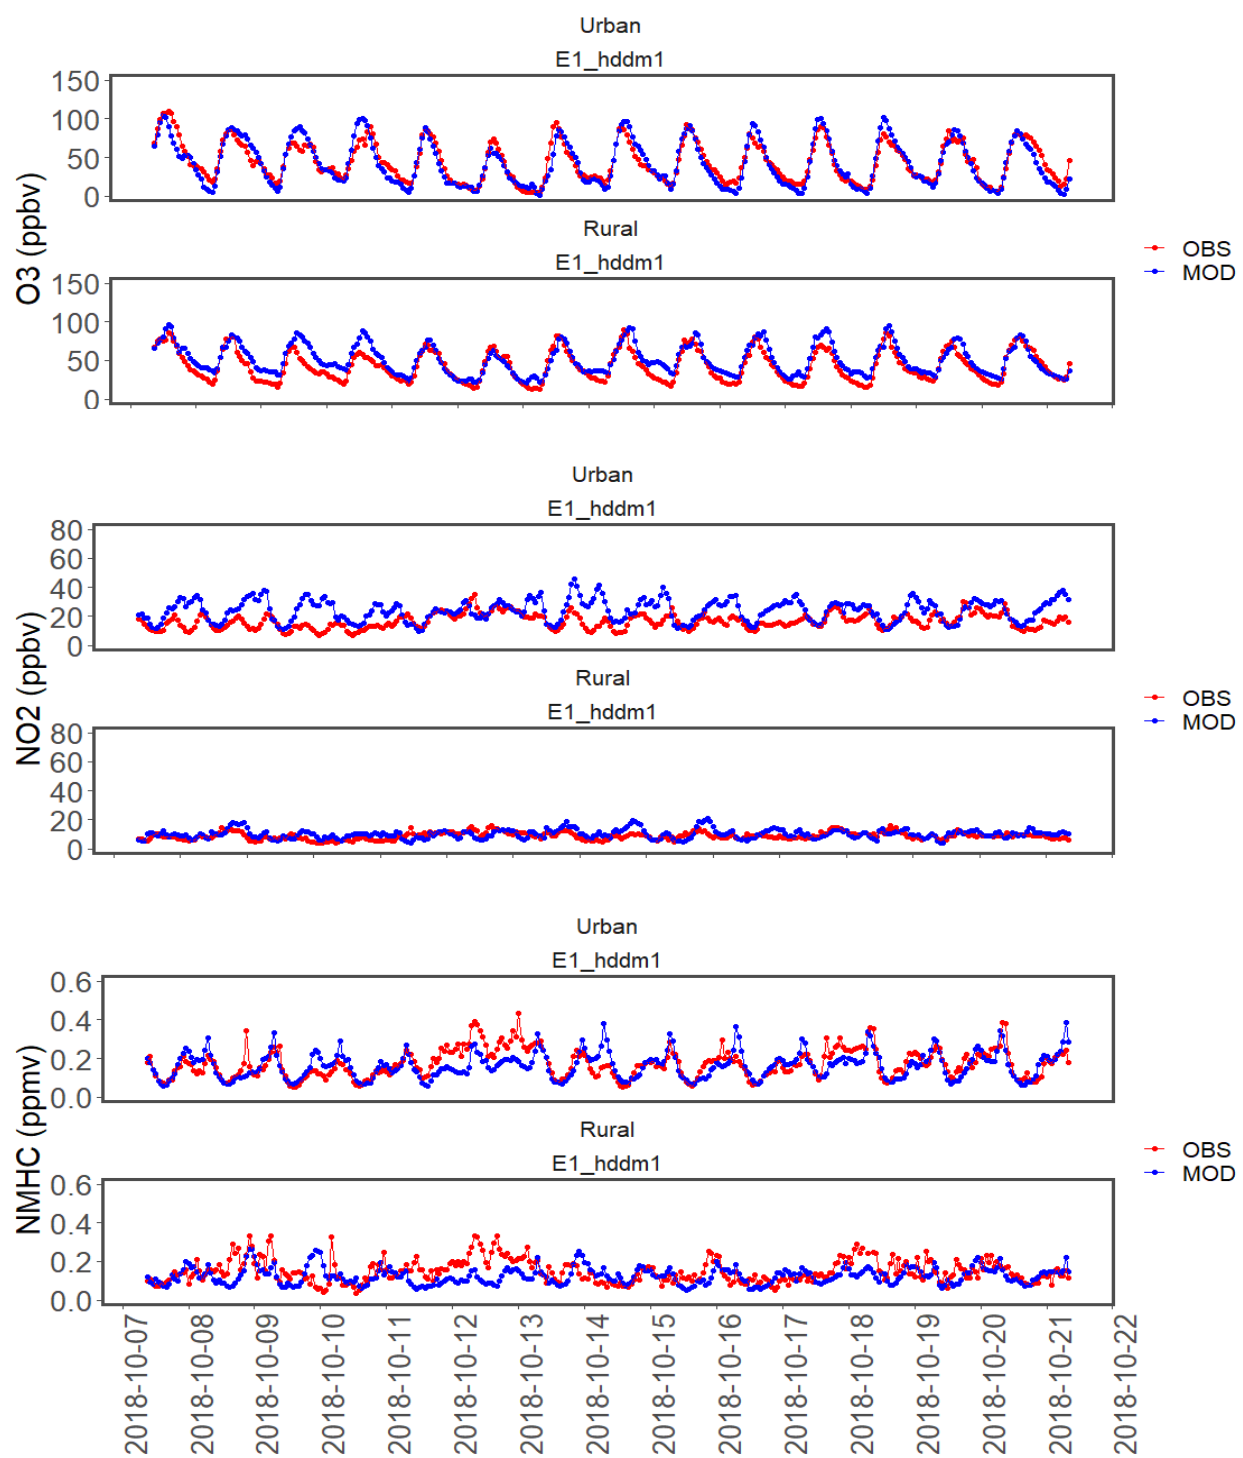

Figure S9: Time series of observed and modelled O<sub>3</sub>, NO<sub>2</sub> and VOC averaged over urban (n=10) and rural (n=5) TEPA air quality stations during entire simulation period. Refer Table S3 for urban and rural TEPA air quality stations.

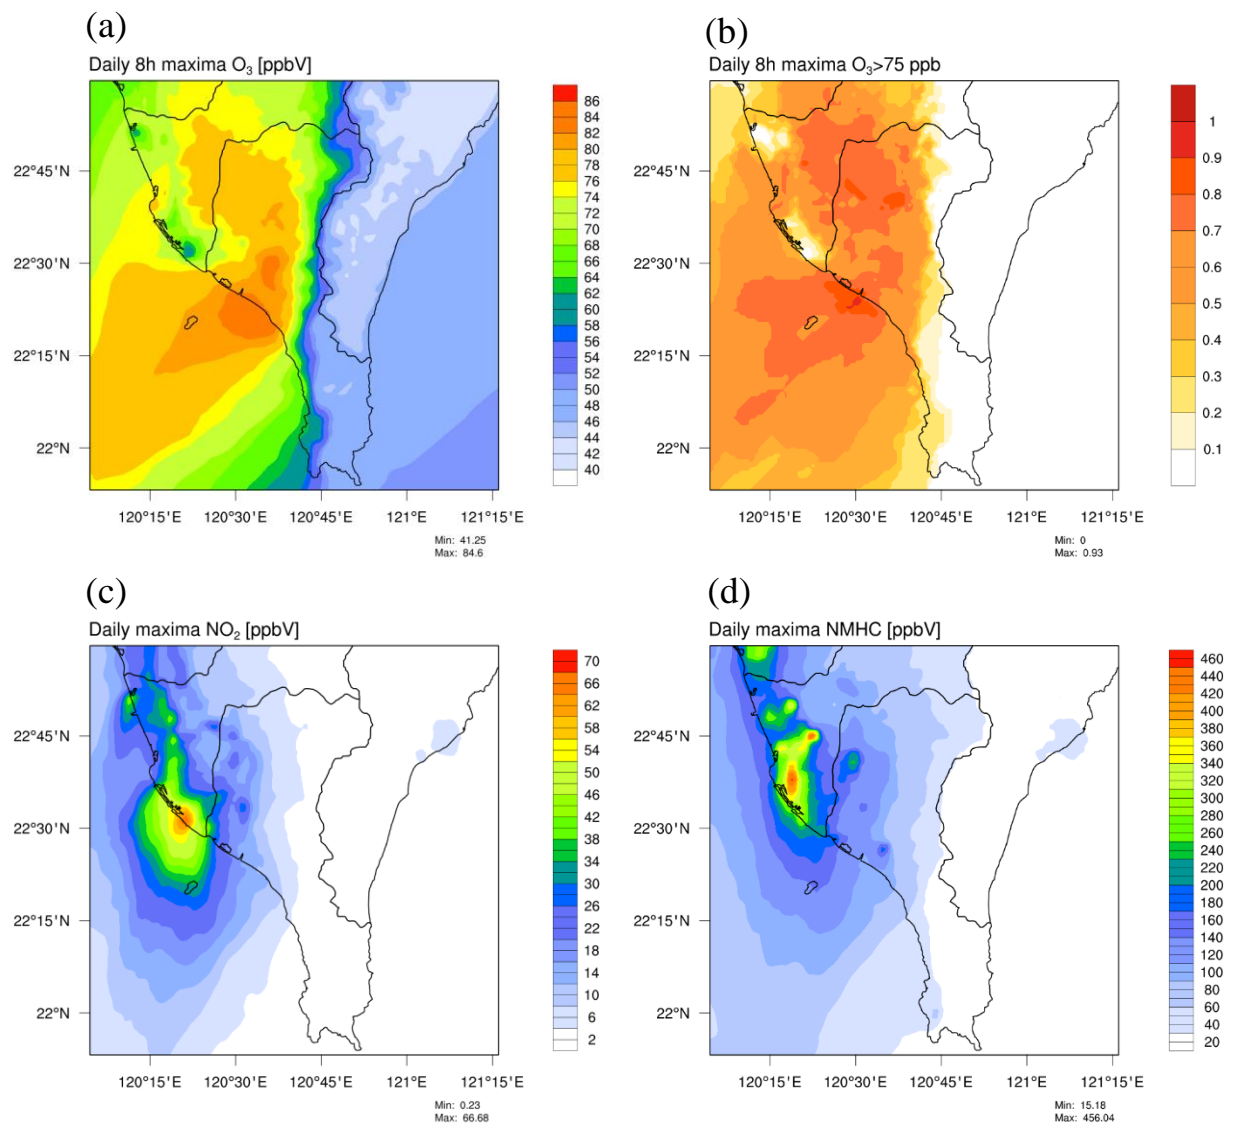

Figure S10: Spatial distribution of (a) daily 8h maxima  $O_3$ , (b) occurrence of daily 8h maxima  $O_3 > 75$  ppb (c) daily maxima  $NO_2$ , (d) daily maxima VOC, averaged during the entire simulation period at the lowest model level in the innermost domain.

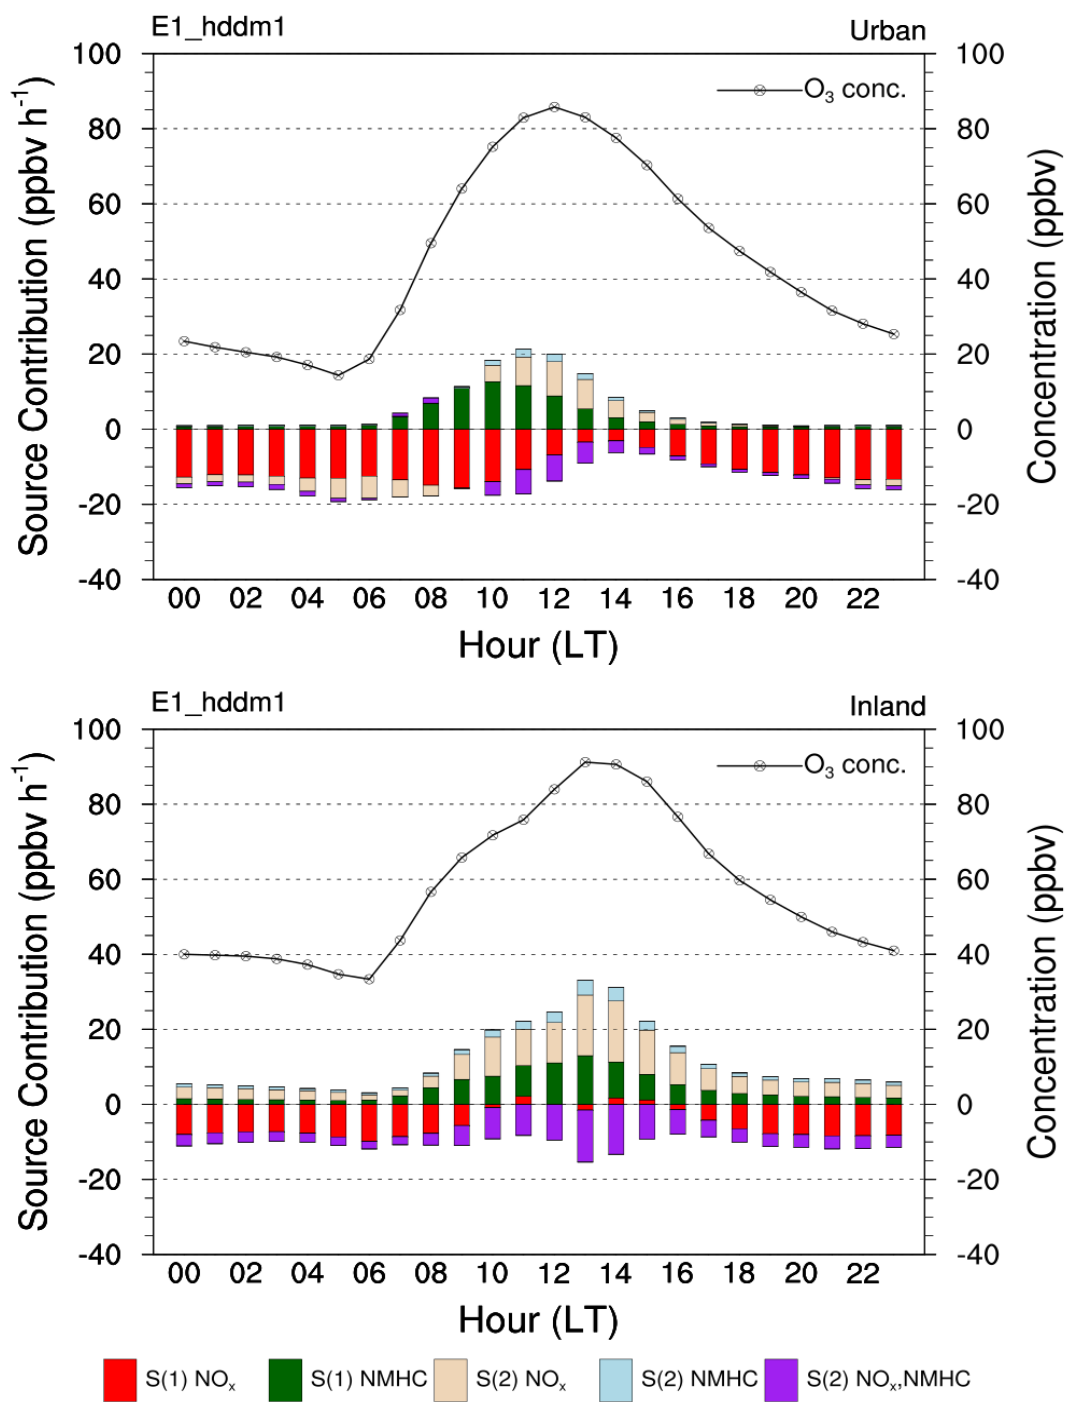

Figure S11: Hourly ozone concentrations (line) and decomposition of the zero-out source contributions of domain-wide NO<sub>x</sub> and VOC emissions averaged for (a) urban and (b) inland area, during the entire simulation period. S(1) and S(2) denotes the first-order and second-order sensitivity, respectively; S(2) NO<sub>x</sub>, VOC denotes the cross-order sensitivity.

Table S1: Mapping of PAMS-VOC species to CMAQ CB6 modelled VOC species. Oxygenates (FORM, ALD2, ALDX, ACET, KET) and alcohols (ETO, MEOH) are not available in PAMS-VOC species inventory.

|           |                        | ← Increasing of sensitivity coefficient |     |     |     |     |      |             |             |            |            |            |             |             |      |      |      |             |      |            |      |
|-----------|------------------------|-----------------------------------------|-----|-----|-----|-----|------|-------------|-------------|------------|------------|------------|-------------|-------------|------|------|------|-------------|------|------------|------|
|           |                        | XYL                                     | OLE | PAR | ETH | TOL | IOLE | Oxy<br>FORM | Alc<br>ISOP | Alc<br>ETO | Alc<br>TER | Oxy<br>MEO | Oxy<br>ALD2 | Oxy<br>ALDX | PRPA | ETHA | NAPH | Oxy<br>ACET | BENZ | Oxy<br>KET | ETHY |
| alkane    | Ethane                 |                                         |     |     |     |     |      |             |             |            |            |            |             |             |      | M    |      |             |      |            |      |
| alkene    | Ethylene               |                                         |     |     | M   |     |      |             |             |            |            |            |             |             |      |      |      |             |      |            |      |
| alkane    | Propane                |                                         |     |     |     |     |      |             |             |            |            |            |             |             | M    |      |      |             |      |            |      |
| alkene    | Propylene              |                                         | M   |     |     |     |      |             |             |            |            |            |             |             |      |      |      |             |      |            |      |
| alkane    | Isobutane              |                                         |     | M   |     |     |      |             |             |            |            |            |             |             |      |      |      |             |      |            |      |
| alkane    | n-Butane               |                                         |     | M   |     |     |      |             |             |            |            |            |             |             |      |      |      |             |      |            |      |
| alkyne    | Acetylene              |                                         |     |     |     |     |      |             |             |            |            |            |             |             |      |      |      |             |      |            | M    |
| alkane    | Isopentane             |                                         |     | M   |     |     |      |             |             |            |            |            |             |             |      |      |      |             |      |            |      |
| alkane    | n-Pentane              |                                         |     | M   |     |     |      |             |             |            |            |            |             |             |      |      |      |             |      |            |      |
| isoprene  | Isoprene               |                                         |     |     |     |     |      |             | M           |            |            |            |             |             |      |      |      |             |      |            |      |
| alkane    | n-Hexane               |                                         |     | M   |     |     |      |             |             |            |            |            |             |             |      |      |      |             |      |            |      |
| aromatics | Benzene                |                                         |     |     |     |     |      |             |             |            |            |            |             |             |      |      |      |             | M    |            |      |
| alkane    | Cyclohexane            |                                         |     | M   |     |     |      |             |             |            |            |            |             |             |      |      |      |             |      |            |      |
| alkane    | 2,2,4-Trimethylpentane |                                         |     | M   |     |     |      |             |             |            |            |            |             |             |      |      |      |             |      |            |      |
| aromatics | Toluene                |                                         |     |     |     | M   |      |             |             |            |            |            |             |             |      |      |      |             |      |            |      |
| aromatics | Ethylbenzene           |                                         |     |     |     |     |      |             |             |            |            |            |             |             |      |      |      |             | M    |            |      |
| aromatics | m,p-Xylene             |                                         | M   |     |     |     |      |             |             |            |            |            |             |             |      |      | M    |             |      |            |      |
| aromatics | o-Xylene               |                                         | M   |     |     |     |      |             |             |            |            |            |             |             |      |      | M    |             |      |            |      |
| aromatics | Isopropylbenzene       |                                         |     |     |     |     |      |             |             |            |            |            |             |             |      |      |      |             | M    |            |      |
| aromatics | m-Ethyltoluene         |                                         |     |     |     | M   |      |             |             |            |            |            |             |             |      |      |      |             |      | M          |      |
| aromatics | 1,2,4-Trimethylbenzene |                                         |     |     |     |     |      |             |             |            |            |            |             |             |      |      |      |             | M    |            |      |

Table S2: Model evaluation metrics for meteorology (T2, WS, WD, RH) and air quality pollutants (O<sub>3</sub>, NO<sub>2</sub>, VOC) averaged from 15 TEPA air quality stations during the entire simulation period.

|          | <b>Meteorology</b> |                  |           |           | <b>Pollutants</b>    |                       |            |
|----------|--------------------|------------------|-----------|-----------|----------------------|-----------------------|------------|
|          | <b>T2</b>          | <b>WS</b>        | <b>WD</b> | <b>RH</b> | <b>O<sub>3</sub></b> | <b>NO<sub>2</sub></b> | <b>VOC</b> |
| Unit     | °C                 | ms <sup>-1</sup> | degree    | %         | ppbv                 | ppbv                  | ppmv       |
| Mean OBS | 26.8               | 2.0              | -         | 77.1      | 43.6                 | 14.1                  | 0.17       |
| Mean MOD | 25.9               | 2.2              | -         | 70.4      | 45.2                 | 19.6                  | 0.16       |
| MB       | -0.9               | 0.2              | -         | -6.7      | 1.6                  | 5.5                   | -0.01      |
| MAGE     | 1.2                | 1.0              | -         | 7.5       | 12.5                 | 7.7                   | 0.1        |
| MNB      | -3.3               | 7.6              | -         | -8.9      | 2.6                  | 27.9                  | -0.4       |
| MNE      | 3.8                | 44.0             | -         | 9.1       | 27.1                 | 41.5                  | 35.1       |
| IOA      | 0.89               | 0.85             | -         | 0.80      | 0.91                 | 0.67                  | 0.63       |
| WNMB     | -                  | -                | -1.1      | -         | -                    | -                     | -          |
| WNME     | -                  | -                | 28.3      | -         | -                    | -                     | -          |

MB: mean bias ( $\pm 1.5^{\circ}\text{C}$ ,  $\pm 1.5\text{ms}^{-1}$ ); MNB: mean normalized bias ( $\pm 15\%$  O<sub>3</sub>, -40-50% NO<sub>2</sub> | VOC)  
MAGE: mean average gross error ( $< 3.0^{\circ}\text{C}$ ,  $< 3.0\text{ms}^{-1}$ ); MNE: mean normalized error ( $< 35\%$  O<sub>3</sub>,  $< 80\%$  NO<sub>2</sub> | VOC)  
IOA: index of agreement ( $> 0.60$ )  
WNMB: wind normalized mean bias ( $< \pm 10\%$ ); WNME: wind normalized mean error ( $< 30\%$ )

Table S3: Description of 15 TEPA air quality and 3 PAMS stations used in this study

| <b>ID</b> | <b>Station</b> | <b>Lon</b> | <b>Lat</b> | <b>Type</b> | <b>Urban/Rural</b> |
|-----------|----------------|------------|------------|-------------|--------------------|
| TEPA1     | Zuoying        | 120.29     | 22.67      | Ambient     | Urban              |
| TEPA2     | Nanzi          | 120.33     | 22.73      | Ambient     | Urban              |
| TEPA3     | Qianjin        | 120.29     | 22.63      | Ambient     | Urban              |
| TEPA4     | Xiaogang       | 120.34     | 22.57      | Ambient     | Urban              |
| TEPA5     | Linyuan        | 120.41     | 22.48      | Ambient     | Urban              |
| TEPA6     | Daliao         | 120.43     | 22.56      | Ambient     | Urban              |
| TEPA7     | Renwu          | 120.33     | 22.69      | Ambient     | Urban              |
| TEPA8     | Meinong        | 120.53     | 22.88      | Ambient     | Rural              |
| TEPA9     | Pingtung       | 120.49     | 22.67      | Ambient     | Rural              |
| TEPA10    | Chaozhou       | 120.56     | 22.52      | Ambient     | Rural              |
| TEPA11    | Qianzhen       | 120.31     | 22.61      | Industrial  | Urban              |
| TEPA12    | Fuxing         | 120.31     | 22.61      | Traffic     | Urban              |
| TEPA13    | Fengshan       | 120.36     | 22.63      | Traffic     | Urban              |
| TEPA14    | Qiaotou        | 120.31     | 22.76      | Background  | Rural              |
| TEPA15    | Hengchun       | 120.79     | 21.96      | Park        | Rural              |
| PAM1      | Chaozhou (CZ)  | 120.56     | 22.52      | -           | -                  |
| PAM2      | Qiaotou (QT)   | 120.64     | 22.76      | -           | -                  |
| PAM3      | Xiaogang (XG)  | 120.34     | 22.57      | -           | -                  |

Table S4: Episode-averaged of NO<sub>x</sub> and VOC emissions (tones per day, tpd), area and emission density by region.

| <b>Region</b> | <b>NO<sub>x</sub><br/>Emissions<br/>(tpd)</b> | <b>Area<br/>(km<sup>2</sup>)</b> | <b>Emission Density<br/>(tpd/km<sup>2</sup>)</b> | <b>VOC<br/>Emissions<br/>(tpd)</b> | <b>Area<br/>(km<sup>2</sup>)</b> | <b>Emission Density<br/>(tpd/km<sup>2</sup>)</b> | <b>Reference</b>     |
|---------------|-----------------------------------------------|----------------------------------|--------------------------------------------------|------------------------------------|----------------------------------|--------------------------------------------------|----------------------|
| Atlanta       | 536                                           | 25168                            | 0.021                                            | -                                  | -                                | -                                                | (Cohan et al., 2005) |
| Macon         | 63                                            | 5749                             | 0.011                                            | -                                  | -                                | -                                                | (Cohan et al., 2005) |
| Domain        | 3986                                          | 712800                           | 0.006                                            | -                                  | -                                | -                                                | (Cohan et al., 2005) |
| Houston       | 501                                           | 21783                            | 0.023                                            | 1469                               | 21783                            | 0.067                                            | (Xiao et al., 2010)  |
| Ship Channel  | 100                                           | 320                              | 0.313                                            | 108                                | 320                              | 0.338                                            | (Xiao et al., 2010)  |
| Domain        | 2620                                          | 43532                            | 0.060                                            | 2140                               | 43532                            | 0.049                                            | (Xiao et al., 2010)  |
| Kaohsiung     | 723                                           | 2835                             | 0.255                                            | -                                  | 2835                             | -                                                | This study           |
| Pingtung      | 381                                           | 2788                             | 0.137                                            | -                                  | 2788                             | -                                                | This study           |
| Urban         | 807                                           | 653                              | 1.236                                            | -                                  | 653                              | -                                                | This study           |
| Inland        | 187                                           | 459                              | 0.407                                            | -                                  | 459                              | -                                                | This study           |
| Domain        | 1466                                          | 14400                            | 0.102                                            | -                                  | 14400                            | -                                                | This study           |
